# Supplementary material for: The feasibility of implementing the General Movement Assessment tool in the Neonatal Intensive Care Unit of a Tertiary Hospital in Malawi: A qualitative study of caregivers and healthcare workers’ experiences.
Source: Research Square preprint supplement (doi:10.21203/rs.3.rs-8536627/v1), 2026-02-09
Supplement: Supplementary file 1 [file 3e25aecd1e788bf5233a0293.docx]

Table 1. Characteristics of caregivers (N=15) and Healthcare workers (N=10)

|  | Variable | Value | N | % | Mean | Standard  Deviation |
| --- | --- | --- | --- | --- | --- | --- |
| Caregivers | Gender | Male | 0 | 0 |  |  |
|  |  | Female | 15 | 100 |  |  |
|  | Age |  |  |  | 26 | 7 |
|  | Level of Education | Primary | 8 | 53 |  |  |
|  |  | Secondary | 7 | 47 |  |  |
|  |  | Tertiary | 0 | 0 |  |  |
|  | HIV Status | Positive | 3 | 20 |  |  |
|  |  | Negative | 12 | 80 |  |  |
|  | Marital Status | Single | 3 | 20 |  |  |
|  |  | Married | 11 | 73 |  |  |
|  |  | Divorce | 1 | 7 |  |  |
|  | Number of Children |  |  |  | 3 | 1 |
|  | Occupation | Housewife | 6 | 40 |  |  |
|  |  | Business | 5 | 33 |  |  |
|  |  | Farmer | 1 | 7 |  |  |
|  |  | Not working | 1 | 7 |  |  |
|  |  | Security | 1 | 7 |  |  |
|  |  | Saloon | 1 | 7 |  |  |
|  | Duration of Interview (Minutes) |  |  |  | 24 | 10 |
| Healthcare workers |  |  |  |  |  |  |
|  | Gender | Male | 2 | 20 |  |  |
|  |  | Female | 8 | 80 |  |  |
|  | Profession | Nurse (Technician) | 2 | 20 |  |  |
|  |  | Nurse (Registered) | 2 | 20 |  |  |
|  |  | Registrar | 2 | 20 |  |  |
|  |  | Medical officer | 3 | 30 |  |  |
|  |  | Medical intern | 1 | 10 |  |  |
|  | NICU experience (months) |  |  |  | 23 | 14 |
|  |  |  |  |  |  |  |
