# Supplementary material for: The feasibility of implementing the General Movement Assessment tool in the Neonatal Intensive Care Unit of a Tertiary Hospital in Malawi: A qualitative study of caregivers and healthcare workers’ experiences.
Source: Research Square preprint supplement (doi:10.21203/rs.3.rs-8536627/v1), 2026-02-09
Supplement: Supplementary file 2 [file 51331218fd2de772f0247876.docx]

**
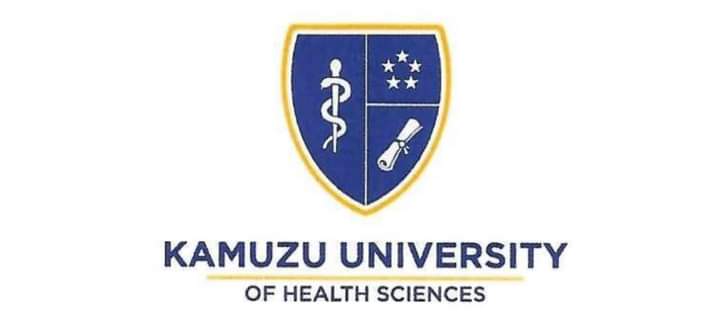
**

**APPENDIX 4A. INTERVIEW GUIDE FOR CAREGIVERS (ENGLISH VERSION)**

**Project Title: IDENTIFYING INFANTS AT RISK OF DEVELOPING CEREBRAL PALSY AND DEVELOPING A CAREGIVER ADMINISTERED INTERVENTION IN BLANTYRE-MALAWI**

| KEY  Components   - Thank you - My name - Purpose - Confidentiality - Duration - Opportunity for questions - Signing consent form   Questions | I want to thank you for taking your time to meet me today.  My name is……………….. and I would like to talk to you about your experience in the hospital (NICU) since you were admitted. Specifically, I want to talk to you about what you know regarding infants at risk of brain damage and the support you get. I will want to find out if know about its risks. Furthermore, I will want to know your opinion regarding the video that was taken and about any information that was given to you about the condition that your child is in.  The interview should take less than 30 minutes. I will be recording this session because I do not want to miss any of your comments. although I will be taking some notes during the session, I cannot possibly write fast enough to get it all down. Because we are on tape, please, be sure to speak up so that we do not miss your comments. All responses will be kept confidential. This means that your interview responses will only be shared with research team members, and we will ensure that any information we include in our report does not identify you as the respondent. Remember, you do not have to talk about anything you do not want to and you may end the interview at any time. Are there any questions? Are you willing to participate in this interview?   - Describe to me in detail what you know about brain damage (Cerebral palsy)?   -where did you get this information from  - What are its risk factors?  -what do other people say about this condition in your community   - Describe to me in detail why you have your child admitted into the NICU?   -have been told why  -who gave you that information?   - What is your opinion on the support you get to support you in the NICU - Who provides - What support - Describe to me about the video that was taken for your infant?   -What was your experience of the whole process?  -is there anything that you would want to be done differently?  -Is there anything you liked about the process?   - Do you have any question to ask me?   This is where we end up our interview and I thank you so much for participating  Thank you. |
| --- | --- |
|  |  |
